# Supplementary material for: SO 2 and NH 3 emissions enhance organosulfur compounds and fine particle formation from the photooxidation of a typical aromatic hydrocarbon
Source: Copernicus journal article supplement (doi:10.5194/acp-21-7963-2021), 2021-05-25
Supplement: Supplementary file 1 [file acp-21-7963-2021-supplement.pdf]

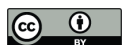

*Supplement of*

**SO<sub>2</sub> and NH<sub>3</sub> emissions enhance organosulfur compounds and fine particle formation from the photooxidation of a typical aromatic hydrocarbon**

**Zhaomin Yang et al.**

*Correspondence to:* Lin Du ([lindu@sdu.edu.cn](mailto:lindu@sdu.edu.cn))

The copyright of individual parts of the supplement might differ from the article licence.

## S1. Size-dependent wall loss correction method

In the present work, the size-dependent particle wall-loss rate constants were determined based on the SMPS-measured particle size distribution. The first-order loss rate constants ( $k_i$ ) of particles in each size bin  $i$  across all measured sizes were firstly calculated as the slope of the corresponding ln-linear fit line:

$$\ln[M_i(t)] = -k_i t + C \quad (S1)$$

where  $M_i$  ( $\mu\text{g m}^{-3}$ ) is the mass concentration of particles in size bin  $i$  at time  $t$  (min) and  $C$  is an arbitrary constant. Then, the relationship between the  $k_i$  and the particle diameter ( $d_{p,i}$ ) can be described as follows:

$$k_i(d_{p,i}) = ad_{p,i}^b + cd_{p,i}^{-d} \quad (S2)$$

The optimized fitted line shown in Fig. S1 can express well our independent seed experimental results. Parameters  $a$ ,  $b$ ,  $c$ , and  $d$  in Eq. (S2) were determined to be  $5.5 \times 10^{-6}$ , 1.05, 0.18, 1.19, respectively. Therefore, the size-dependent loss rate ( $k$ ) of ammonium sulfate particles can be expressed as  $k = 5.5 \times 10^{-6} \times d_p^{1.05} + 0.18 \times d_p^{-1.19}$ .

## S2. The formed H<sub>2</sub>SO<sub>4</sub> estimation and inorganic mixture experiments

In order to evaluate the SO<sub>2</sub> effects on SOA formation, we used the method of Ye et al. (2018) to calculate the contribution of the generated H<sub>2</sub>SO<sub>4</sub> to the particle formation enhancement in TMB/NO<sub>x</sub>/SO<sub>2</sub> photooxidation (Ye et al., 2018; Wyche et al., 2009), where we assumed the conversion of the consumed SO<sub>2</sub> into H<sub>2</sub>SO<sub>4</sub> aerosol particles. The contribution of the formed H<sub>2</sub>SO<sub>4</sub> to the increase in particle volume concentration was less than 100 % (Fig. S6), demonstrating that the enhanced SOA formation is also responsible for the increased particle volume concentration. Additionally, a previous study has shown that half of the reacted SO<sub>2</sub> can transform into sulfur-containing organic species during the photooxidation of 1,3,5-trimethylbenzene/o-xylene/octane/toluene (Vivanco et al., 2011). HRMS measurements revealed the OSs production in this work, which may result in the decrease in the amount of H<sub>2</sub>SO<sub>4</sub> in the particle phase. Therefore, the enhancement in aerosol particles by SO<sub>2</sub> introduction cannot be solely attributed to inorganic aerosol formation. Pure SO<sub>2</sub> oxidation experiments without introducing TMB were also carried out. In the TMB/NO<sub>x</sub>/SO<sub>2</sub> regime, the consumption of 9.9 and 23.3 ppb SO<sub>2</sub> could cause the particle

volume concentration to increase by 32.9 and 89.2  $\mu\text{m}^3 \text{cm}^{-3}$ , respectively. However, in pure  $\text{SO}_2$  oxidation experiments, the volume concentrations of the formed particles were only 25.3 and 43.2  $\mu\text{m}^3 \text{cm}^{-3}$  when the consumptions of  $\text{SO}_2$  were 9.5 and 24.2 ppb, respectively. Comparison of the results of TMB/ $\text{NO}_x$ / $\text{SO}_2$  and pure  $\text{SO}_2$  oxidation experiments also demonstrates that the enhancement in aerosol particles by  $\text{SO}_2$  introduction cannot be solely attributed to inorganic aerosol formation.

**Table S1.** Particle parameters for experiments 1–8.

| <b>Exp.</b> | <b>Nucleation time<br/>(min)</b> | <b>Particle mean diameter<br/>(nm)</b> | <b>Initial particle growth rate<br/>(nm h<sup>-1</sup>)</b> |
|-------------|----------------------------------|----------------------------------------|-------------------------------------------------------------|
| 1           | 70                               | 125.5                                  | 46.53                                                       |
| 2           | 15                               | 109.9                                  | 20.09                                                       |
| 3           | 10                               | 121.2                                  | 27.42                                                       |
| 4           | 10                               | 130.6                                  | 31.09                                                       |
| 5           | 100                              | 123.1                                  | 23.51                                                       |
| 6           | 20                               | 118.5                                  | 19.30                                                       |
| 7           | 10                               | 112.4                                  | 22.14                                                       |
| 8           | 10                               | 136.5                                  | 29.82                                                       |

**Table S2.** Summary of characteristic wavenumbers of selected functional groups.

| <b>Functional groups</b>                  | <b>Absorption frequencies<br/>(cm<sup>-1</sup>)</b> | <b>References</b>      |
|-------------------------------------------|-----------------------------------------------------|------------------------|
| organic nitrates (RONO <sub>2</sub> )     | 860, 1280, 1630–1640                                | (Bruns et al., 2010)   |
| sulfates (SO <sub>4</sub> <sup>2-</sup> ) | 612–615, 1103–1135                                  | (Hawkins et al., 2010) |
| aliphatic carbon (C-H)                    | 2850–3000                                           | (Zhong and Jang, 2014) |
| esters (RC(O)OR')                         | 1050–1160                                           | (Hung et al., 2013)    |
| O-O                                       | 960                                                 | (Jia and Xu, 2018)     |
| C-N stretch                               | 1315                                                | (Liu et al., 2015)     |
| carboxylic acids<br>(RC(O)OH)             | 875–970, 1210–1320,<br>1685–1740, 2500–3300         | (Hung et al., 2013)    |
| aldehydes (RC(O)H)                        | 1325–1450, 1720–1740                                | (Hung et al., 2013)    |
| ketones (RC(O)R')                         | 1100–1170, 1715–1745                                | (Hung et al., 2013)    |
| alcohols (R-OH)                           | 3200–3500                                           | (Zhong and Jang, 2014) |

**Table S3.** Compounds detected in aerosol particles from TMB/NO<sub>x</sub> and TMB/NO<sub>x</sub>/SO<sub>2</sub> photooxidation using UPLC-HRMS.

| Molecular weight      | Measured [M - H] <sup>-</sup> | Suggested ion formula                                        | Error (ppm) <sup>c</sup> | Retention times (min) | Proposed chemical structure <sup>d</sup>                                              |
|-----------------------|-------------------------------|--------------------------------------------------------------|--------------------------|-----------------------|---------------------------------------------------------------------------------------|
| 146 <sup>a, b</sup>   | 145.01418                     | C <sub>5</sub> H <sub>5</sub> O <sub>5</sub> <sup>-</sup>    | -0.490                   | 3.59                  | 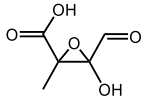   |
| 162 <sup>a, b</sup>   | 161.04555                     | C <sub>6</sub> H <sub>9</sub> O <sub>5</sub> <sup>-</sup>    | -0.468                   | 3.89, 4.63, 4.99      |    |
| 164 <sup>a, b</sup>   | 163.02481                     | C <sub>5</sub> H <sub>7</sub> O <sub>6</sub> <sup>-</sup>    | -0.751                   | 3.14                  |    |
| 176 <sup>a, b</sup>   | 175.06091                     | C <sub>7</sub> H <sub>11</sub> O <sub>5</sub> <sup>-</sup>   | -1.620                   | 17.77                 |    |
| 178 <sup>a, b</sup>   | 177.04030                     | C <sub>6</sub> H <sub>9</sub> O <sub>6</sub> <sup>-</sup>    | -0.919                   | 2.35, 8.80            |   |
| 231 <sup>a, b</sup>   | 230.06656                     | C <sub>9</sub> H <sub>12</sub> O <sub>6</sub> N <sup>-</sup> | -1.962                   | 17.68, 15.03          |  |
| <b>Organosulfates</b> |                               |                                                              |                          |                       |                                                                                       |
| 226 <sup>b</sup>      | 225.00772                     | C <sub>6</sub> H <sub>9</sub> O <sub>7</sub> S <sup>-</sup>  | 1.219                    | 4.10, 5.11            |  |
| 228 <sup>b</sup>      | 227.00150                     | C <sub>5</sub> H <sub>7</sub> O <sub>8</sub> S <sup>-</sup>  | -2.059                   | 20.48, 20.67          |  |
| 240 <sup>b</sup>      | 239.02271                     | C <sub>7</sub> H <sub>11</sub> O <sub>7</sub> S <sup>-</sup> | -1.638                   | 6.39, 7.76, 8.70      |  |
| 242 <sup>b</sup>      | 241.00168                     | C <sub>6</sub> H <sub>9</sub> O <sub>8</sub> S <sup>-</sup>  | -2.833                   | 3.61, 4.21            |  |
| 244 <sup>b</sup>      | 242.99619                     | C <sub>5</sub> H <sub>7</sub> O <sub>9</sub> S <sup>-</sup>  | -2.886                   | 12.98, 13.30          |  |

**Table S3.** Continued.

| Molecular weight          | Measured [M - H] <sup>-</sup> | Suggested ion formula                                          | Error (ppm) <sup>c</sup> | Retention times (min) | Proposed chemical structure <sup>d</sup>                                              |
|---------------------------|-------------------------------|----------------------------------------------------------------|--------------------------|-----------------------|---------------------------------------------------------------------------------------|
| 300 <sup>b</sup>          | 299.04395                     | C <sub>9</sub> H <sub>15</sub> O <sub>9</sub> S <sup>-</sup>   | -0.938                   | 3.56, 11.29, 11.85    | 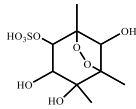   |
| 316 <sup>b</sup>          | 315.03867                     | C <sub>9</sub> H <sub>15</sub> O <sub>10</sub> S <sup>-</sup>  | -1.494                   | 7.23                  |    |
| 345 <sup>b</sup>          | 344.02853                     | C <sub>9</sub> H <sub>14</sub> O <sub>11</sub> NS <sup>-</sup> | -2.250                   | 9.70                  |    |
| 214 <sup>b</sup>          | 212.98590                     | C <sub>8</sub> H <sub>5</sub> O <sub>5</sub> S <sup>-</sup>    | -1.954                   | 15.04                 | Unidentified                                                                          |
| 268 <sup>b</sup>          | 267.01724                     | C <sub>8</sub> H <sub>11</sub> O <sub>8</sub> S <sup>-</sup>   | -2.879                   | 10.41                 | Unidentified                                                                          |
| <b>Organic sulfonates</b> |                               |                                                                |                          |                       |                                                                                       |
| 228 <sup>b</sup>          | 227.00159                     | C <sub>9</sub> H <sub>7</sub> O <sub>5</sub> S <sup>-</sup>    | -1.675                   | 20.51, 20.68          |    |
| 230 <sup>b</sup>          | 229.01706                     | C <sub>9</sub> H <sub>9</sub> O <sub>5</sub> S <sup>-</sup>    | -2.437                   | 22.66, 22.94, 23.39   |  |

<sup>a</sup> The products were observed in the TMB/NO<sub>x</sub> photooxidation.

<sup>b</sup> The products were detected in the TMB/NO<sub>x</sub>/SO<sub>2</sub> photooxidation.

<sup>c</sup> The molecular formula was assigned based on accurate mass measurements with a mass tolerance of ± 5 ppm.

<sup>d</sup> Only one possible isomer was shown here.

**Table S4.** Observed  $C_cH_hO_oN_n$  products in both  $SO_2$ -free and  $SO_2$ -involved experiments with  $NH_3$  addition.

| Molecular weight | Measured ions | Suggested ion formula | Error (ppm) <sup>c</sup> | Retention times (min)   | O/C  | $\log_{10}C^*$ ( $\mu g\ m^{-3}$ ) <sup>d</sup> |
|------------------|---------------|-----------------------|--------------------------|-------------------------|------|-------------------------------------------------|
| 74 <sup>a</sup>  | 72.99308      | $C_2HO_3^-$           | -0.508                   | 2.20                    | 1.50 | 6.16                                            |
| 88 <sup>a</sup>  | 87.00876      | $C_3H_3O_3^-$         | -0.100                   | 3.02                    | 1.00 | 6.18                                            |
| 150 <sup>a</sup> | 149.0088      | $C_4H_5O_6^-$         | -1.882                   | 2.35                    | 1.50 | 2.16                                            |
| 114 <sup>a</sup> | 113.02439     | $C_5H_5O_3^-$         | -0.231                   | 9.65, 10.62             | 0.60 | 5.87                                            |
| 146 <sup>a</sup> | 145.01407     | $C_5H_5O_5^-$         | -1.277                   | 3.61                    | 1.00 | 3.53                                            |
| 162 <sup>a</sup> | 161.00876     | $C_5H_5O_6^-$         | 4.311                    | 2.78, 2.89              | 1.20 | 2.23                                            |
| 148 <sup>a</sup> | 147.02985     | $C_5H_7O_5^-$         | -0.342                   | 3.19                    | 1.00 | 3.53                                            |
| 164 <sup>a</sup> | 163.02470     | $C_5H_7O_6^-$         | -0.657                   | 3.12                    | 1.20 | 2.23                                            |
| 174 <sup>a</sup> | 173.00879     | $C_6H_5O_6^-$         | 4.188                    | 3.34                    | 1.00 | 2.20                                            |
| 128 <sup>a</sup> | 127.04013     | $C_6H_7O_3^-$         | 0.497                    | 14.71, 15.13            | 0.50 | 5.61                                            |
| 144 <sup>a</sup> | 143.03482     | $C_6H_7O_4^-$         | -1.128                   | 7.64,9.12, 11.53        | 0.67 | 4.58                                            |
| 160 <sup>a</sup> | 159.03011     | $C_6H_7O_5^-$         | 1.314                    | 9.34, 10.15, 12.77      | 0.83 | 3.43                                            |
| 176 <sup>a</sup> | 175.02451     | $C_6H_7O_6^-$         | 4.520                    | 4.20                    | 1.00 | 2.20                                            |
| 146 <sup>a</sup> | 145.05052     | $C_6H_9O_4^-$         | -0.759                   | 8.80                    | 0.67 | 4.58                                            |
| 162 <sup>a</sup> | 161.04543     | $C_6H_9O_5^-$         | -0.753                   | 3.87, 4.63, 4.98, 5.94  | 0.83 | 3.43                                            |
| 178 <sup>a</sup> | 177.04028     | $C_6H_9O_6^-$         | -1.005                   | 2.35, 8.79              | 1.00 | 2.20                                            |
| 172 <sup>a</sup> | 171.02988     | $C_7H_7O_5^-$         | -0.116                   | 6.63, 11.07,12.96       | 0.71 | 3.28                                            |
| 188 <sup>a</sup> | 187.02446     | $C_7H_7O_6^-$         | 3.985                    | 12.18                   | 0.86 | 2.11                                            |
| 156 <sup>a</sup> | 157.05048     | $C_7H_9O_4^-$         | -0.993                   | 10.14, 11.11, 16.53     | 0.57 | 4.36                                            |
| 174 <sup>a</sup> | 173.04514     | $C_7H_9O_5^-$         | -2.376                   | 5.64, 7.98, 9.91, 14.54 | 0.71 | 3.28                                            |
| 190 <sup>a</sup> | 189.03993     | $C_7H_9O_6^-$         | 3.003                    | 3.70, 4.17, 8.33        | 0.86 | 2.11                                            |
| 160 <sup>a</sup> | 159.06609     | $C_7H_{11}O_4^-$      | -1.234                   | 14.35                   | 0.57 | 4.36                                            |
| 176 <sup>a</sup> | 175.06070     | $C_7H_{11}O_5^-$      | -2.840                   | 17.77                   | 0.71 | 3.28                                            |
| 216 <sup>a</sup> | 215.01923     | $C_8H_7O_7^-$         | -2.324                   | 9.96                    | 0.88 | 0.79                                            |
| 186 <sup>a</sup> | 185.04509     | $C_8H_9O_5^-$         | -2.469                   | 12.62                   | 0.63 | 3.08                                            |
| 202 <sup>a</sup> | 201.04025     | $C_8H_9O_6^-$         | 4.418                    | 7.12, 12.36             | 0.75 | 1.97                                            |
| 188 <sup>a</sup> | 187.06075     | $C_8H_{11}O_5^-$      | -2.413                   | 11.10, 11.84, 12.87     | 0.63 | 3.08                                            |
| 204 <sup>a</sup> | 203.05577     | $C_8H_{11}O_6^-$      | 3.724                    | 11.78, 12.20,           | 0.75 | 1.97                                            |
| 184 <sup>a</sup> | 185.08040     | $C_9H_{13}O_4^+$      | -2.360                   | 13.98, 16.27            | 0.44 | 3.81                                            |
| 216 <sup>a</sup> | 215.05579     | $C_9H_{11}O_6^-$      | -1.512                   | 13.38, 16.76            | 0.67 | 1.79                                            |
| 232 <sup>a</sup> | 231.05043     | $C_9H_{11}O_7^-$      | 2.169                    | 12.67,14.10, 19.52      | 0.78 | 0.66                                            |
| 202 <sup>a</sup> | 201.07658     | $C_9H_{13}O_5^-$      | -1.307                   | 24.32                   | 0.56 | 2.85                                            |
| 218 <sup>a</sup> | 217.07117     | $C_9H_{13}O_6^-$      | 2.314                    | 16.44                   | 0.67 | 1.79                                            |
| 234 <sup>a</sup> | 233.06613     | $C_9H_{13}O_7^-$      | -2.336                   | 11.06, 11.78            | 0.78 | 0.66                                            |
| 250 <sup>a</sup> | 249.06107     | $C_9H_{13}O_8^-$      | -2.107                   | 12.43                   | 0.89 | -0.53                                           |

**Table S4.** Continued.

| Molecular weight | Measured ions | Suggested ion formula                                        | Error (ppm) <sup>c</sup> | Retention times (min) | O/C  | log <sub>10</sub> C* (μg m <sup>-3</sup> ) <sup>d</sup> |
|------------------|---------------|--------------------------------------------------------------|--------------------------|-----------------------|------|---------------------------------------------------------|
| 250 <sup>a</sup> | 249.06107     | C <sub>9</sub> H <sub>13</sub> O <sub>8</sub> <sup>-</sup>   | -2.107                   | 12.43                 | 0.89 | -0.53                                                   |
| 220 <sup>a</sup> | 219.08690     | C <sub>9</sub> H <sub>15</sub> O <sub>6</sub> <sup>-</sup>   | -2.339                   | 21.26                 | 0.67 | 1.79                                                    |
| 236 <sup>a</sup> | 235.08188     | C <sub>9</sub> H <sub>15</sub> O <sub>7</sub> <sup>-</sup>   | -1.903                   | 3.91, 4.34            | 0.78 | 0.66                                                    |
| 252 <sup>a</sup> | 251.07664     | C <sub>9</sub> H <sub>15</sub> O <sub>8</sub> <sup>-</sup>   | -2.372                   | 3.63                  | 0.89 | -0.53                                                   |
| 229 <sup>a</sup> | 228.05083     | C <sub>9</sub> H <sub>10</sub> O <sub>6</sub> N <sup>-</sup> | -2.338                   | 10.19, 11.96          | 0.67 | 0.36                                                    |
| 229 <sup>b</sup> | 230.06591     | C <sub>9</sub> H <sub>12</sub> O <sub>6</sub> N <sup>+</sup> | -3.365                   | 25.17                 | 0.67 | 0.36                                                    |
| 231 <sup>a</sup> | 230.06701     | C <sub>9</sub> H <sub>12</sub> O <sub>6</sub> N <sup>-</sup> | -2.028                   | 14.57, 15.01, 17.69   | 0.67 | 0.36                                                    |
| 231 <sup>b</sup> | 232.08087     | C <sub>9</sub> H <sub>14</sub> O <sub>6</sub> N <sup>+</sup> | -2.981                   | 9.43, 11.78           | 0.67 | 0.36                                                    |
| 265 <sup>a</sup> | 264.07187     | C <sub>9</sub> H <sub>14</sub> O <sub>8</sub> N <sup>-</sup> | -2.350                   | 18.69                 | 0.89 | -1.09                                                   |
| 265 <sup>b</sup> | 266.08615     | C <sub>9</sub> H <sub>16</sub> O <sub>8</sub> N <sup>+</sup> | -3.351                   | 17.14                 | 0.89 | -1.09                                                   |
| 191 <sup>a</sup> | 190.03529     | C <sub>6</sub> H <sub>8</sub> O <sub>6</sub> N <sup>-</sup>  | -2.192                   | 2.65                  | 1.00 | 1.36                                                    |

<sup>a</sup> The molecules were detected by UPLC-HRMS in the negative mode.

<sup>b</sup> The molecules were detected by UPLC-HRMS in the positive mode.

<sup>c</sup> The molecular formula was assigned based on accurate mass measurements with a mass tolerance of  $\pm 5$  ppm.

<sup>d</sup> The saturation mass concentrations of observed products were predicted based on the method of Li et al. (2016).



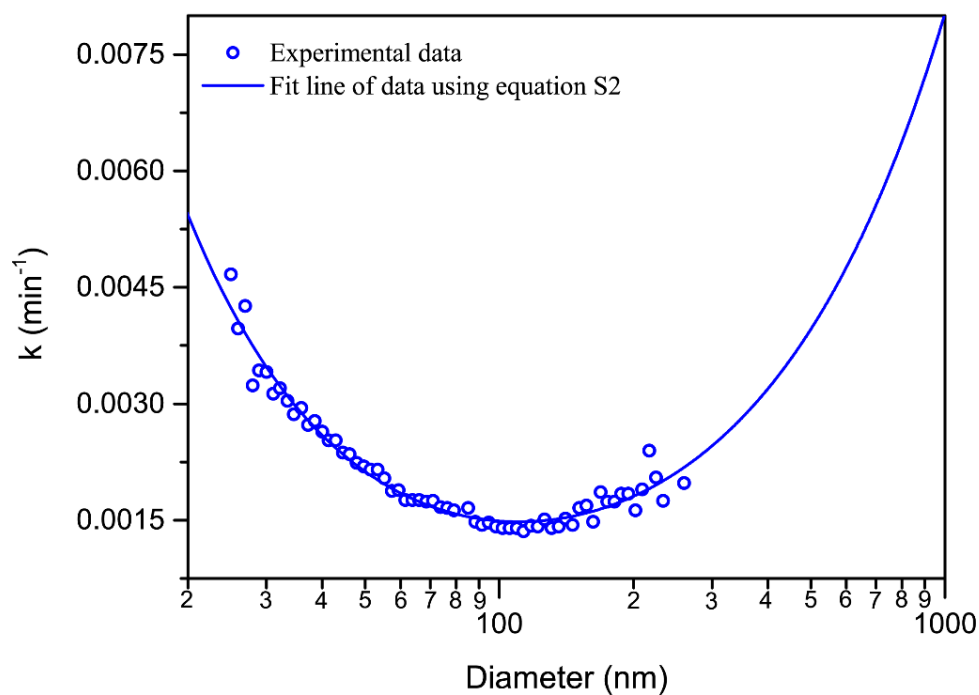

**Figure S1.** Wall loss rate constant of particles as a function of particle diameter.

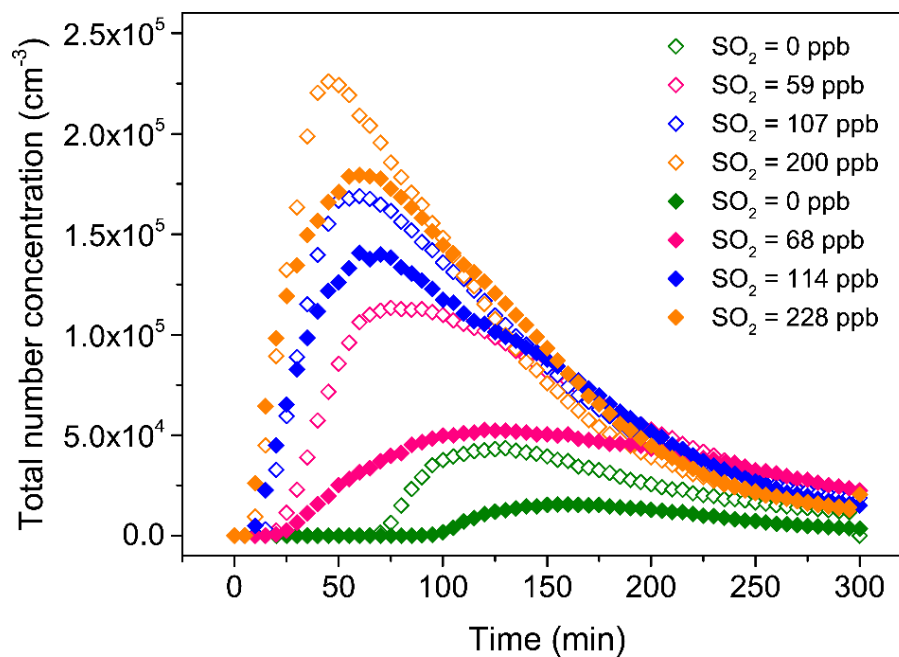

**Figure S2.** The total number concentrations of ultrafine particles ( $< 100$  nm) as a function of reaction time (Exps. 1–8). The open symbols and solid symbols represent low- and high- $\text{NO}_x$  experiments, respectively.

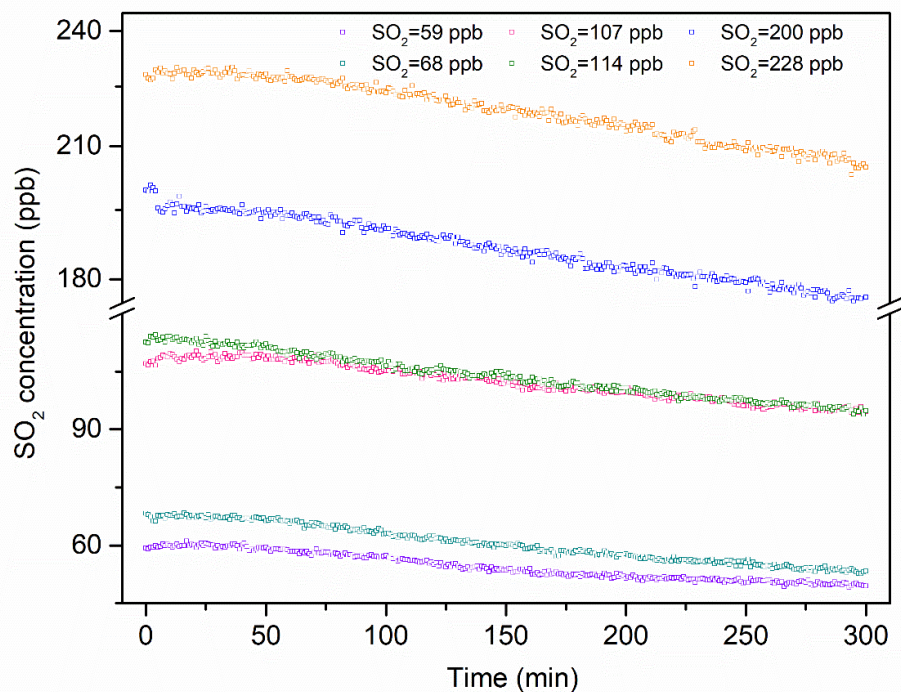

**Figure S3.** Decay of SO<sub>2</sub> during the photooxidation of TMB (Exps. 2–4, 6–8).

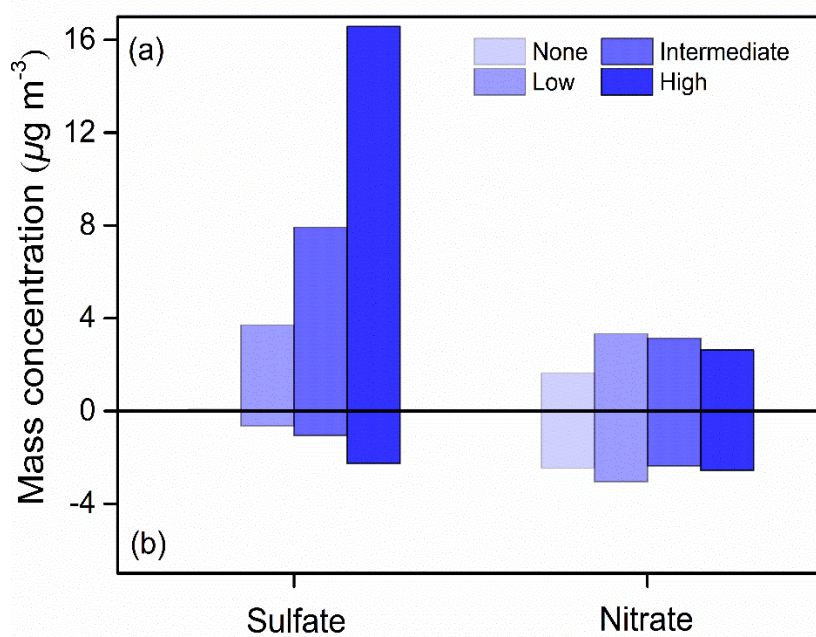

**Figure S4.** The particle sulfate and nitrate loadings for aerosol samples collected from the photooxidation of TMB under low- (a) and high-NO<sub>x</sub> (b) conditions with SO<sub>2</sub> introduction. None: SO<sub>2</sub> = 0 ppb; low: SO<sub>2</sub> = 50–70 ppb intermediate: SO<sub>2</sub> = 100–120 ppb; high: SO<sub>2</sub> = 200–230 ppb.

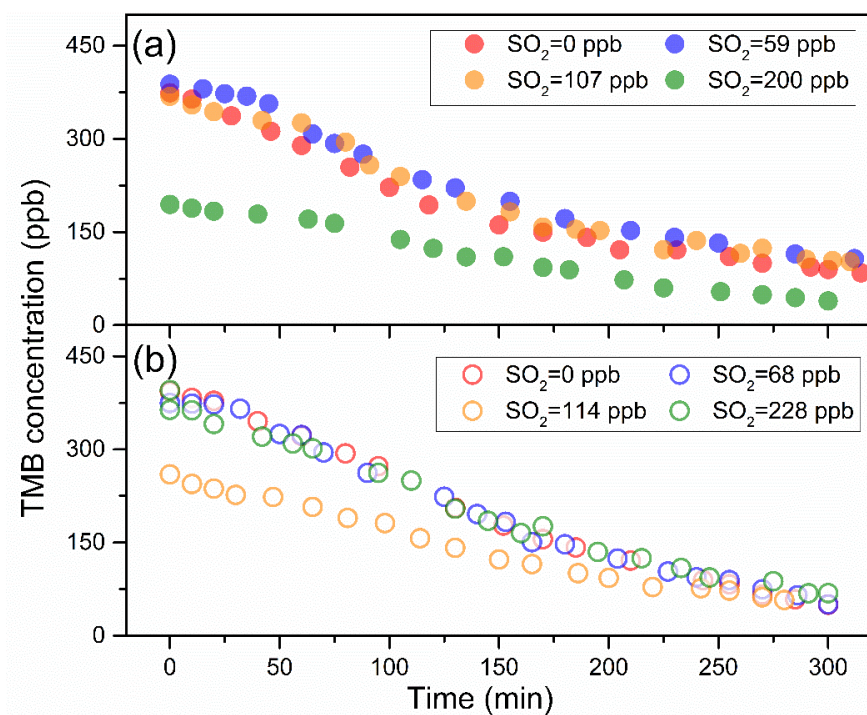

**Figure S5.** Time profiles of TMB for photooxidation experiments under low- (a) and high-NO<sub>x</sub> (b) conditions with different SO<sub>2</sub> levels.

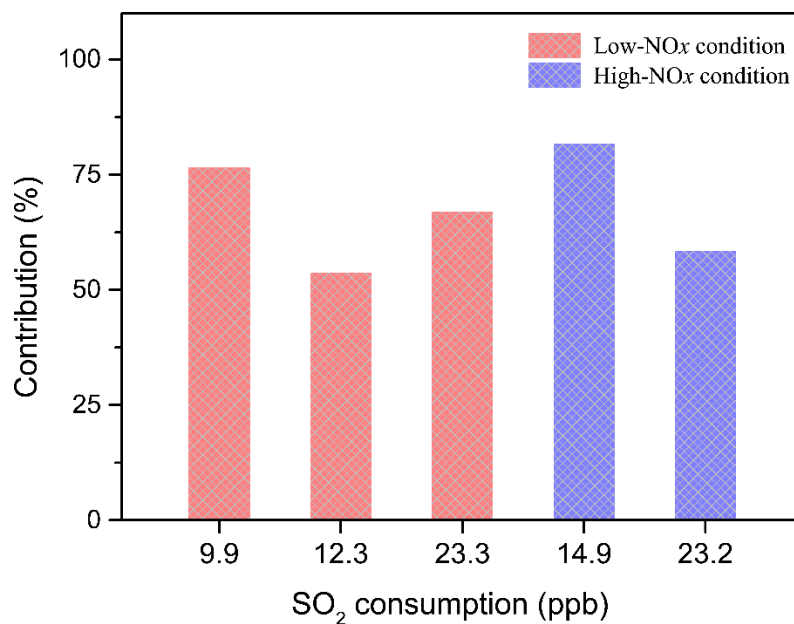

**Figure S6.** Contribution (%) of the formed H<sub>2</sub>SO<sub>4</sub> to the increased particle volume concentration during low-NO<sub>x</sub> and high-NO<sub>x</sub> experiments.

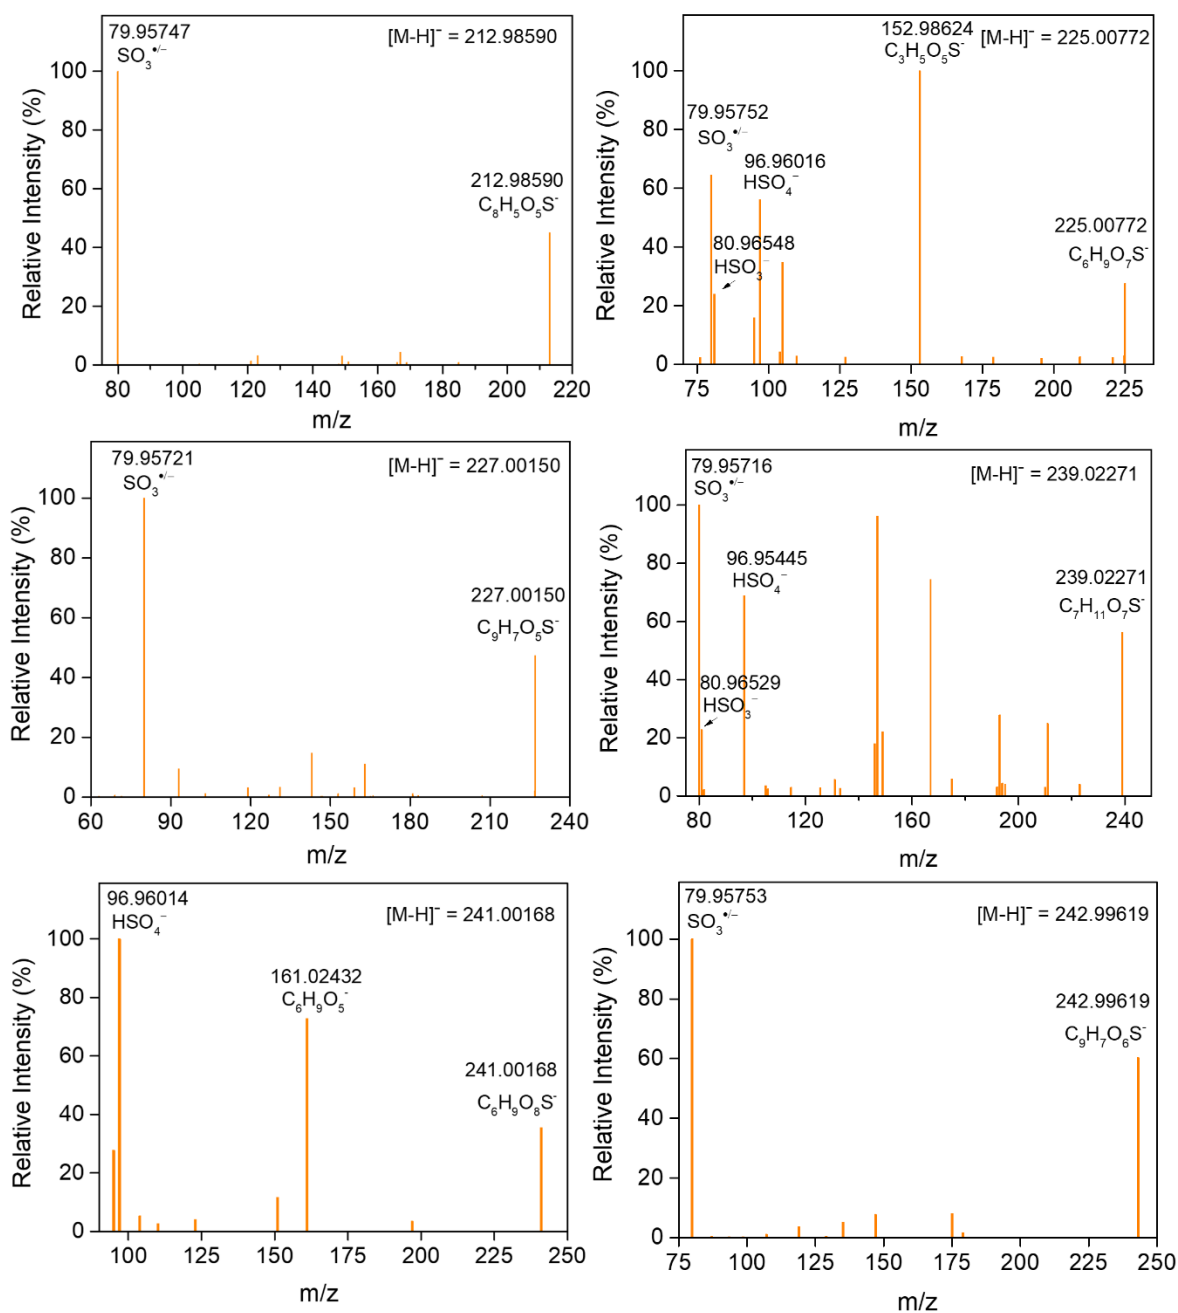

**Figure S7.** MS/MS spectra of organosulfates generated from the photooxidation of TMB in the presence of SO<sub>2</sub>.

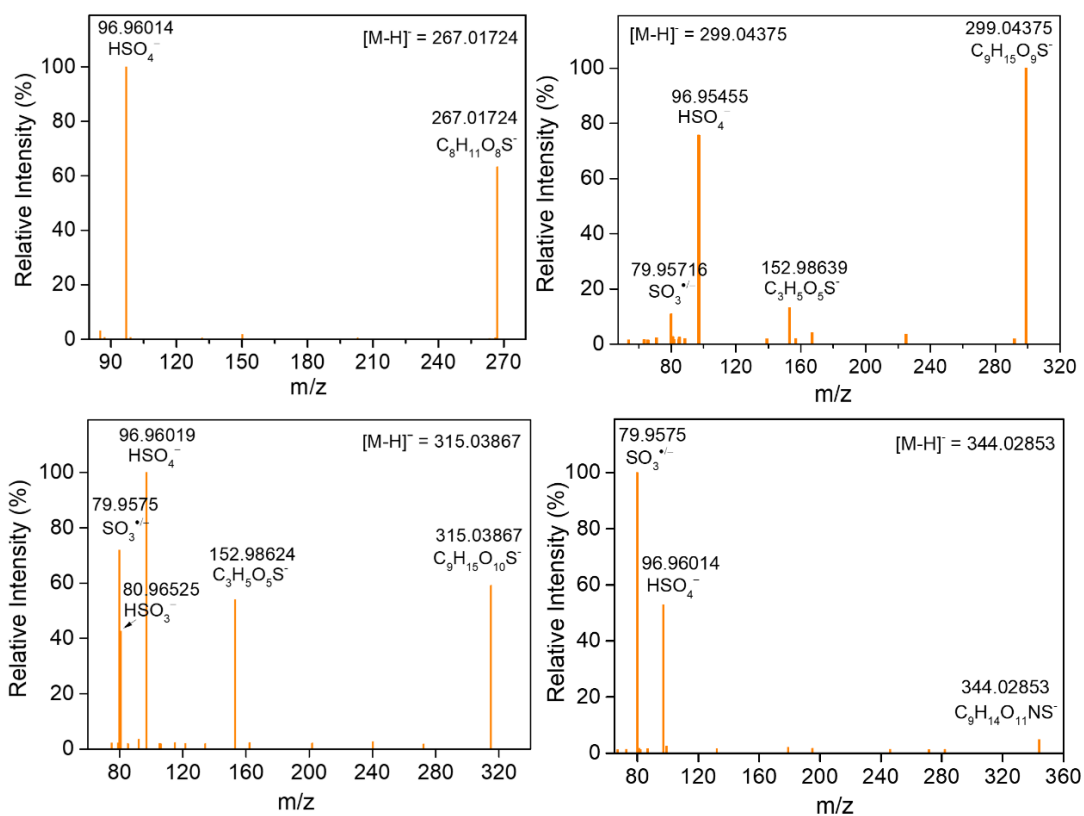

Figure S7. Continued.

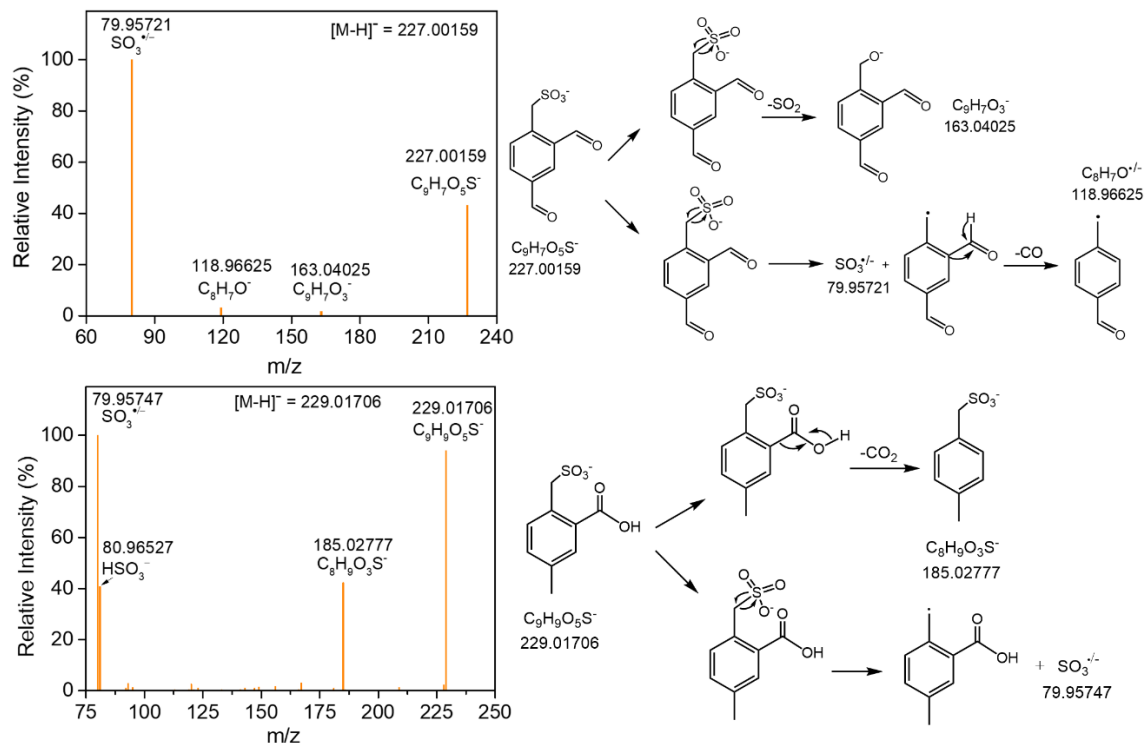

Figure S8. MS/MS spectra and fragmentation schemes of ion at  $m/z$  227.00159 and 229.01706 observed in aerosol particles from TMB photooxidation in the presence of  $\text{SO}_2$ .

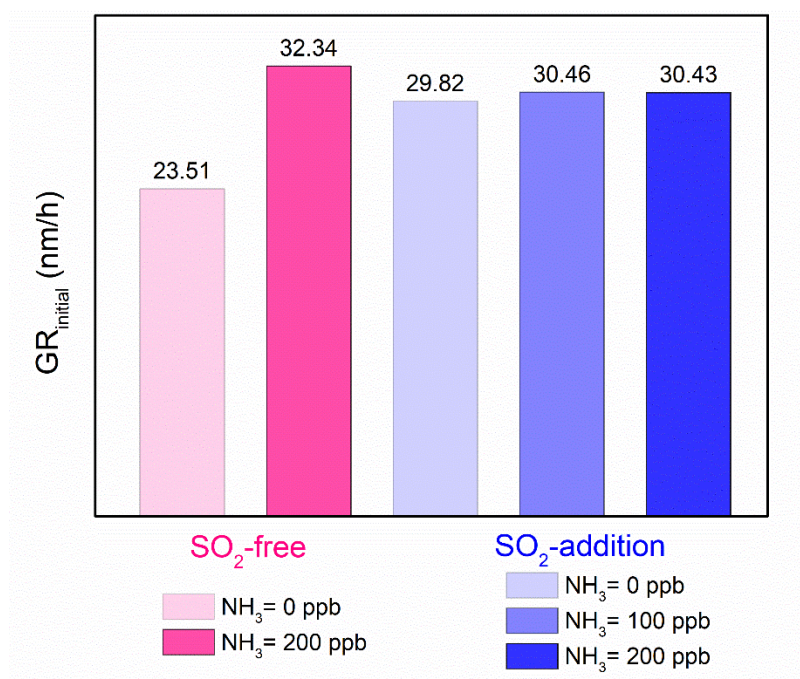

**Figure S9.** Observed initial growth rates of aerosol particles under  $SO_2$ -free and  $SO_2$ -added ( $\sim 230$  ppb) conditions (Exps. 5, 8, 10–12).

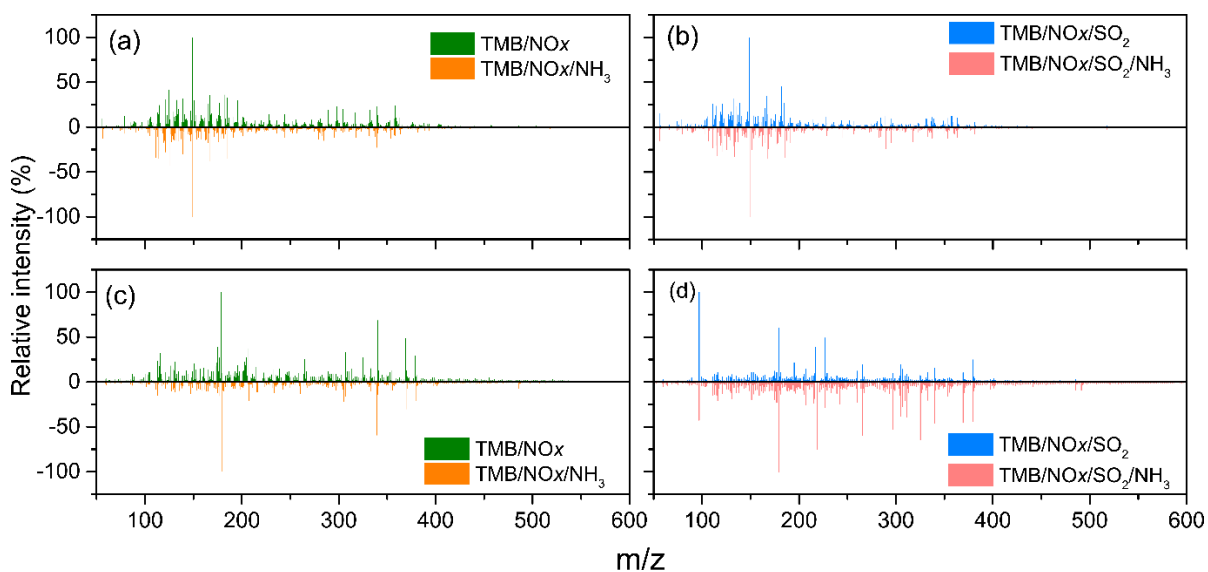

**Figure S10.** High-resolution mass spectra of aerosol particles from TMB photooxidation with/without  $NH_3$  introduction. Panels a–b: positive ion mode. Panels c–d: negative ion mode.

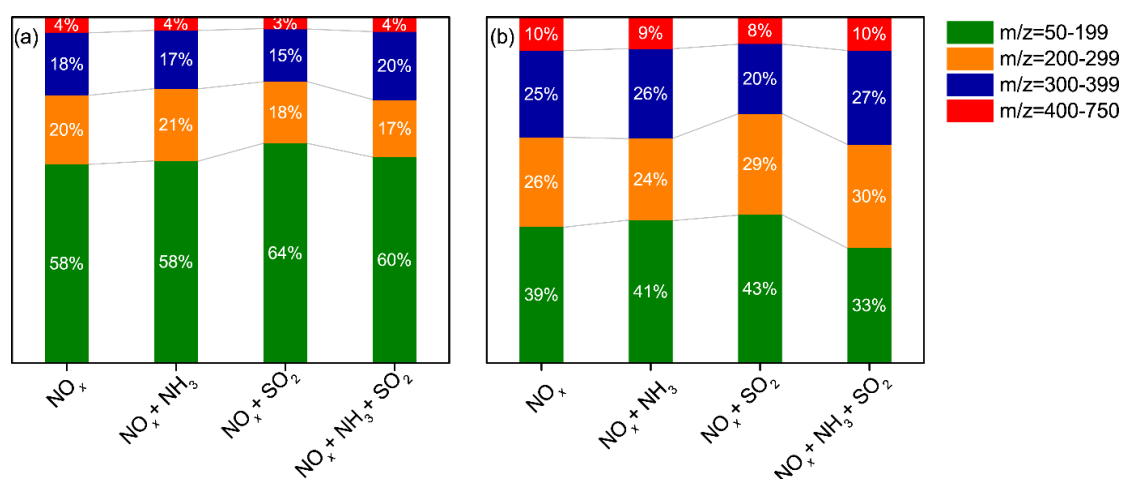

**Figure S11.** Relative contributions (% by abundance) of ions detected by UPLC-HRMS in the positive mode (a) and negative mode (b) for aerosol particles collected from different experiments (Exps. 5, 8, 10, 12).

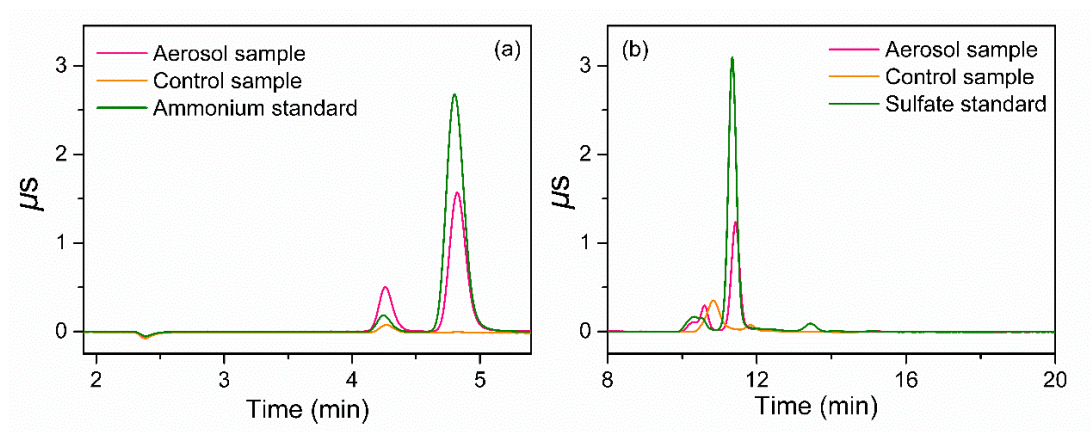

**Figure S12.** Ion chromatography results for aerosol particles formed from the photooxidation of TMB in the presence of SO<sub>2</sub> and NH<sub>3</sub>. Panel (a): Ammonium. Panel (b): Sulfate

## References

- Bruns, E. A., Perraud, V., Zelenyuk, A., Ezell, M. J., Johnson, S. N., Yu, Y., Imre, D., Finlayson-Pitts, B. J., and Alexander, M. L.: Comparison of FTIR and particle mass spectrometry for the measurement of particulate organic nitrates, *Environ. Sci. Technol.*, 44, 1056-1061, 10.1021/es9029864, 2010.
- Hawkins, L. N., Russell, L. M., Covert, D. S., Quinn, P. K., and Bates, T. S.: Carboxylic acids, sulfates, and organosulfates in processed continental organic aerosol over the southeast Pacific Ocean during VOCALS-REx 2008, *J. Geophys. Res.*, 115, D13201, 10.1029/2009jd013276, 2010.
- Hung, H. M., Chen, Y. Q., and Martin, S. T.: Reactive aging of films of secondary organic material studied by infrared spectroscopy, *J. Phys. Chem. A*, 117, 108-116, 10.1021/jp309470z, 2013.
- Jia, L., and Xu, Y.: Different roles of water in secondary organic aerosol formation from toluene and isoprene, *Atmos. Chem. Phys.*, 18, 8137-8154, 10.5194/acp-18-8137-2018, 2018.
- Li, Y., Pöschl, U., and Shiraiwa, M.: Molecular corridors and parameterizations of volatility in the chemical evolution of organic aerosols, *Atmos. Chem. Phys.*, 16, 3327-3344, 10.5194/acp-16-3327-2016, 2016.
- Liu, Y., Liggitto, J., Staebler, R., and Li, S. M.: Reactive uptake of ammonia to secondary organic aerosols: kinetics of organonitrogen formation, *Atmos. Chem. Phys.*, 15, 13569-13584, 10.5194/acp-15-13569-2015, 2015.
- Vivanco, M. G., Santiago, M., Martinez-Tarifa, A., Borrás, E., Rodenas, M., Garcia-Diego, C., and Sanchez, M.: SOA formation in a photoreactor from a mixture of organic gases and HONO for different experimental conditions, *Atmos. Environ.*, 45, 708-715, 10.1016/j.atmosenv.2010.09.059, 2011.
- Wyche, K. P., Monks, P. S., Ellis, A. M., Cordell, R. L., Parker, A. E., Whyte, C., Metzger, A., Dommen, J., Duplissy, J., Prevot, A. S. H., Baltensperger, U., Rickard, A. R., and Wulfert, F.: Gas phase precursors to anthropogenic secondary organic aerosol: detailed observations of 1,3,5-trimethylbenzene photooxidation, *Atmos. Chem. Phys.*, 9, 635-665, 10.5194/acp-9-635-2009, 2009.
- Ye, J., Abbatt, J. P. D., and Chan, A. W. H.: Novel pathway of SO<sub>2</sub> oxidation in the atmosphere: reactions with monoterpene ozonolysis intermediates and secondary organic aerosol, *Atmos. Chem. Phys.*, 18, 5549-5565, 10.5194/acp-18-5549-2018, 2018.
- Zhong, M., and Jang, M.: Dynamic light absorption of biomass-burning organic carbon photochemically aged under natural sunlight, *Atmos. Chem. Phys.*, 14, 1517-1525, 10.5194/acp-14-1517-2014, 2014.
